# Supplementary material
Source: PubMed Central journal article supplement (PMC7458411)
Supplement: NIHMS1616661-supplement-Supplemental_figures.pdf [file NIHMS1616661-supplement-Supplemental_figures.pdf]

# Supplemental Information

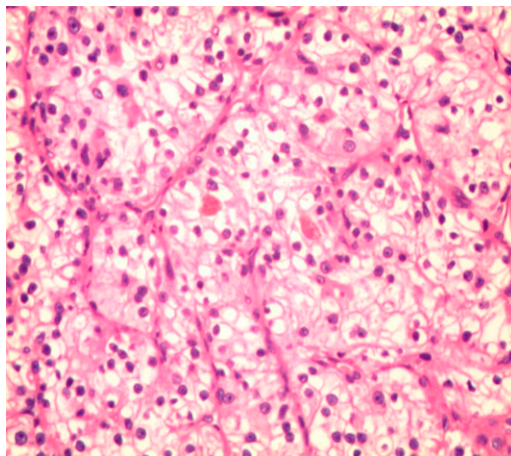

Figure S1. Hematoxylin and Eosin Staining of Clear Cell Renal Cell Tumor from Patient Sampled in This Study, Related to [Figure 1](#)

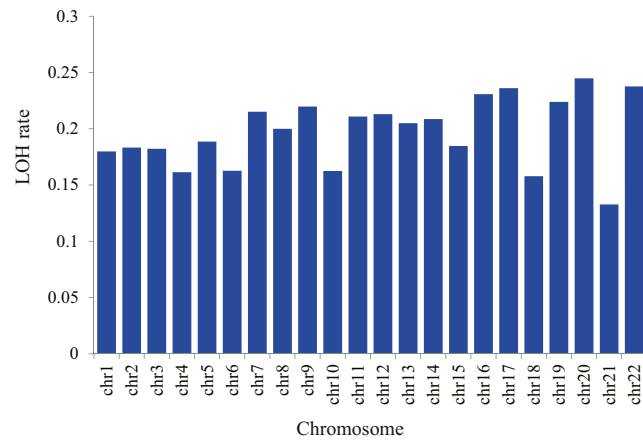

**Figure S2. LOH Analysis of Paired Tissue Sequencing Data, Related to Figure 1**

The LOH ratio was calculated by  $N_L/N_H$ , where  $N_L$  is the number of sites that is homozygous sites in cancer tissue and heterozygous in normal tissue, and  $N_H$  is the number of sites that are heterozygous in normal tissue.

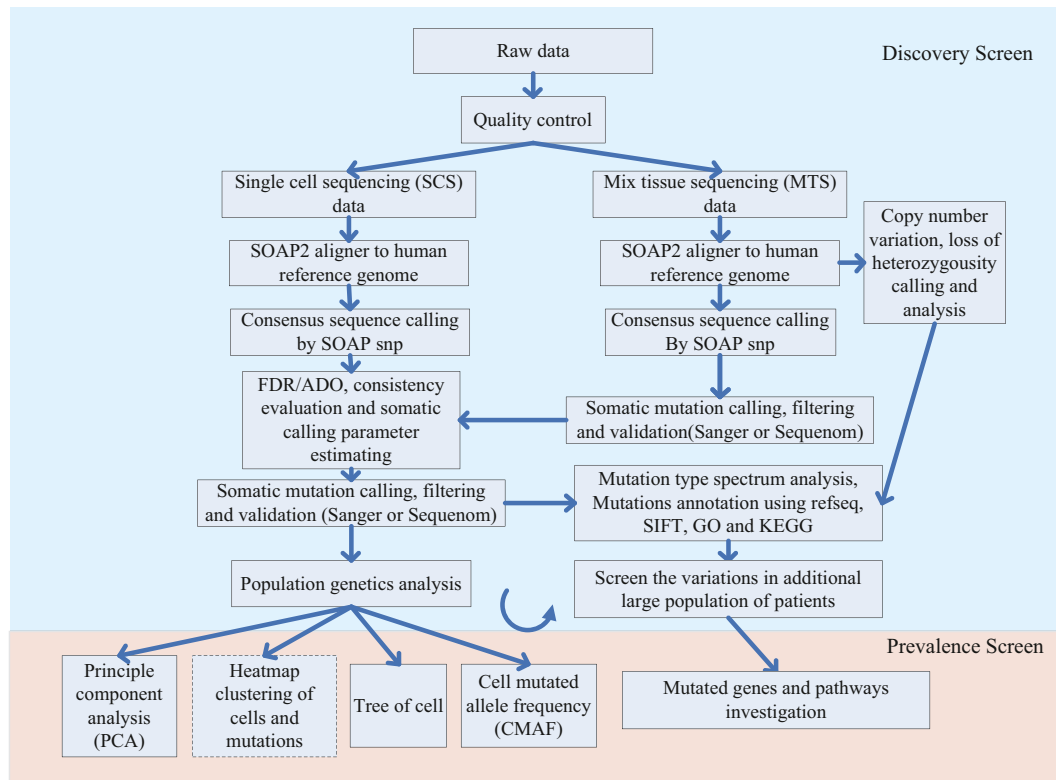

**Figure S3. Analysis Pipeline for Single-Cell Sequencing, Related to Figure 2**  
Dotted rectangles represent analyses that were not performed in this paper.

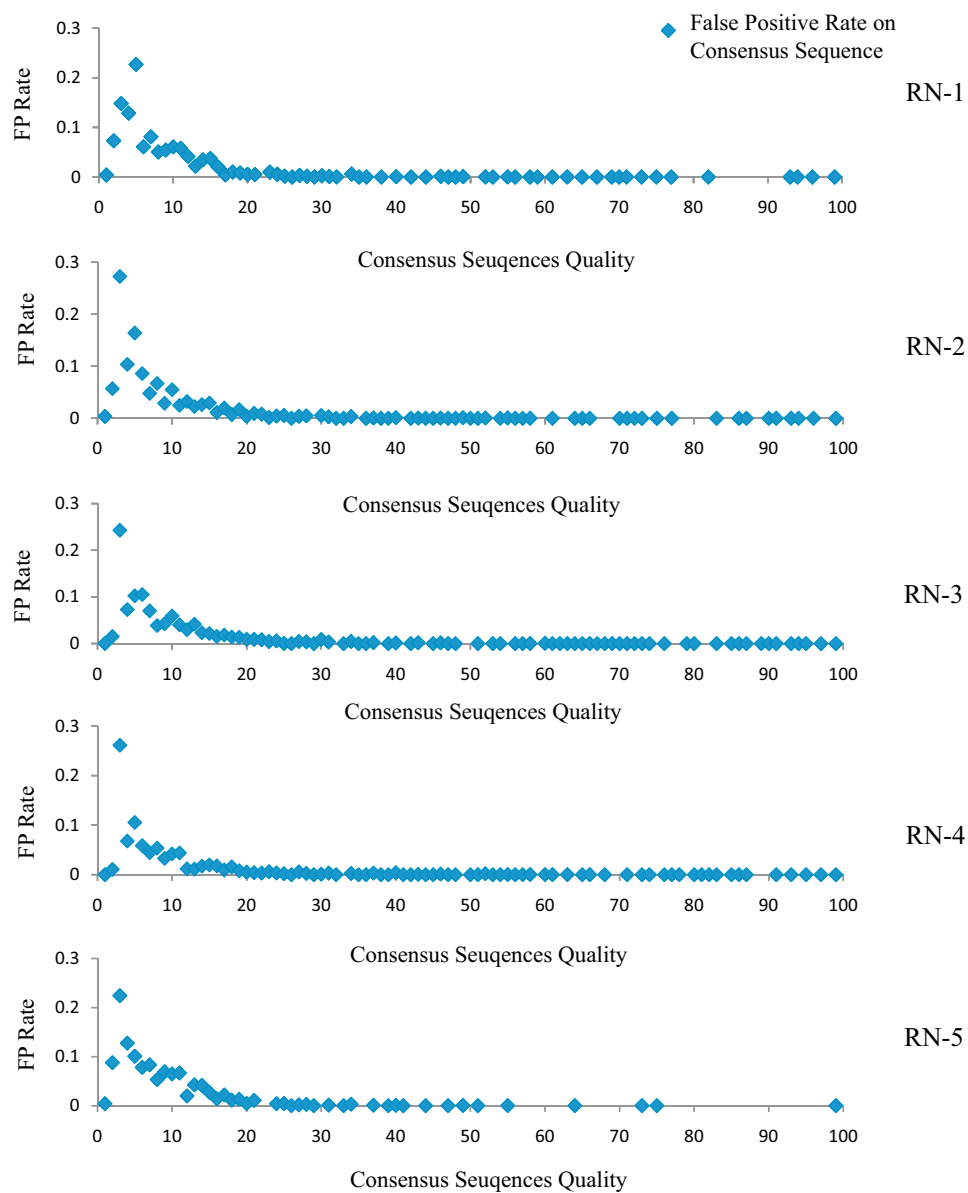

**Figure S4. False Positive Rate Distribution across Different Consensus Sequence Quality, Related to Figure 2**

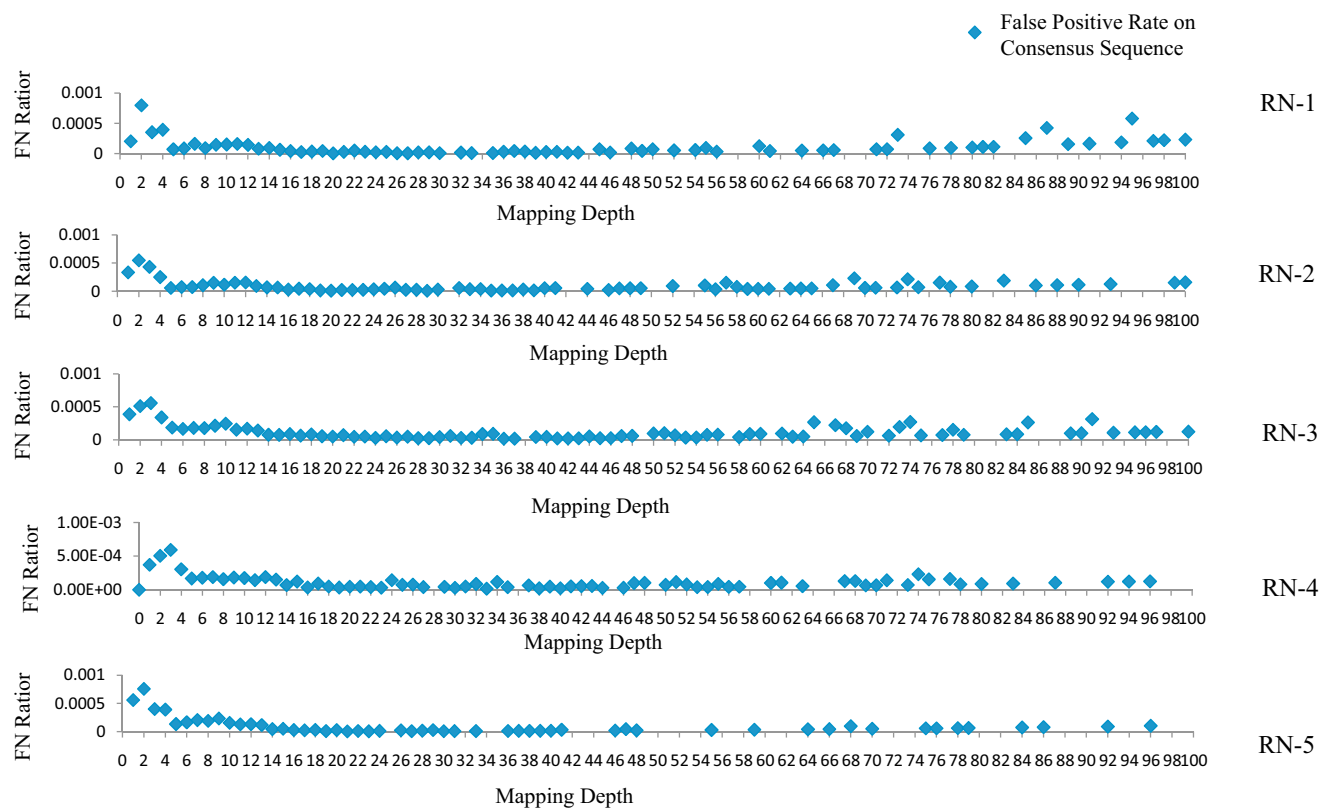

Figure S5. False Positive Rate Distribution across Different Consensus Sequence Depth, Related to Figure 2

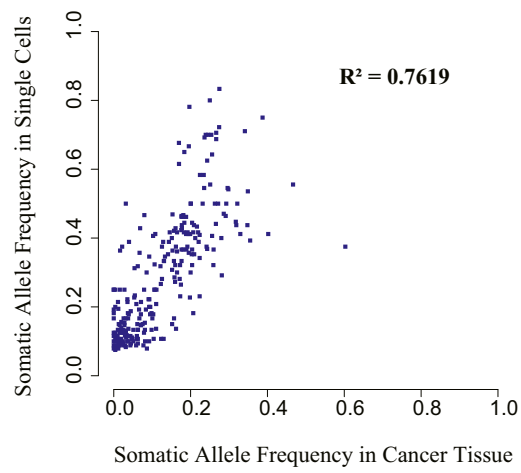

**Figure S6. Somatic Mutation Frequency Correlations, Related to Figure 2**

Somatic mutation frequency between the single cell data set and the corresponding mixed tissue data (the mutant reads ratio) set estimated using squared correlations of allele frequencies ( $R^2$ ).
