# Supplementary material
Source: PubMed Central journal article supplement (PMC7458411)
Supplement: NIHMS1616661-supplement-Supplemental_table_S1___S2.pdf [file NIHMS1616661-supplement-Supplemental_table_S1___S2.pdf]

**Table S1. PCR Primer of Exons of *PBRM1* and *VHL*, Related to Table1**

| Gene Name | Exon ID | PCR Primer-F          | PCR Primer-R          |
|-----------|---------|-----------------------|-----------------------|
| PBRM1     | 1       | ACCCAAAACCAAGAAAACAA  | CAGGAGGTAGAGGTTGCAGT  |
|           | 2       | ATGCAAAGAACTCCAAACC   | GAGCCTCTAACTGTGCCATT  |
|           | 3       | GGTAGGCCTCTGAGTGAAGA  | ACAAAGATTCAAGGGCAGAG  |
|           | 4       | AGTATGCCTCTTGTCCCTTG  | AAGGGTGCTTTATTCATTGG  |
|           | 5       | CCTACCAATTACCAGGGTTG  | GCTTTCTGAATGTGTGTTGC  |
|           | 6       | ATTTGCAGGGGAAAATACAA  | ACCTTGTGATCCACCTGTCT  |
|           | 7       | TGGCACTGACAAAATCTGTT  | ATCCCAACTTTTGACACAAT  |
|           | 8       | AAGTGTCTCTGCCTCATTCC  | AAGAGATCTGCCCACTTCAG  |
|           | 9       | TGCCCTAATTACCACCTGAT  | AACAGCCAGTGAAACTCCTC  |
|           | 10      | GAAGAAAACAAAAGAGCCCA  | CCAAGCTGGTCTCAAACCTCT |
|           | 11      | GCACTTGGCCTGATTTACTT  | ATAAGTCCATTCCGTAGCCA  |
|           | 12      | CAAGTGGTCTTTCACAACGA  | TGAGCTGGACACAGTGACTT  |
|           | 13      | CTGTGACACTTGCCCAATAG  | CTATTGCTGATTCTGCCTT   |
|           | 14      | ATCTTTCCAGGTCTGATGA   | CGTGTGCCATATATCTCCAA  |
|           | 15      | CTTCTCTCCCCACAGAATA   | TCCAGGATACCAGAGGTGAT  |
|           | 16      | AGGGCTTGACAAGAACAAAG  | CCTAGGCTCTCCACAGATA   |
|           | 17      | GAAGAAATTGAGGCTCAGGA  | ACTGCTCCTGCCAGAATTAC  |
|           | 18      | ATAAACTGGCACCCCAATAA  | TGCTGTGATGATTCTGCCT   |
|           | 19      | ACATGTTTTGCCAAGCTACA  | TCATGCAGGCTTTTGTTAAA  |
|           | 20      | CAAGCTGGTCTTGAACCTCT  | GCTTTTGCCCTCTTACTTTG  |
|           | 21      | CTGAGGCAAGAGAATCACCT  | AATTAGCTGGGTGTGATGGT  |
|           | 22      | GTA CTCCCAAACCAGCAAA  | GTTTCCTCGGCTAAGATTGA  |
|           | 23      | ATCTCAAGTGATTCACCCGT  | TACCAGGTCCTCTGGTCACT  |
|           | 24      | CCTCCCAAGTAGCTGTGACT  | ATTGAATGGAAGTCTGCTCC  |
|           | 25      | CGCCAGCTAATTTTTGTAT   | TGAGAATAATGCAGCTCTGG  |
|           | 26      | TGTCCTAAGATGCAATCCAA  | CTCACAAAGCTGCTTCACTG  |
|           | 27      | GTAGAGATGGGGTTTCTCCA  | TTGCAGTGAGCTGAAATTGT  |
|           | 28      | CTCTGGCTGAATGTCCTTTT  | TCATTTGTCTTCTGCCTCAA  |
|           | 29      | TGTAACAGAGCAAGACCCTG  | TGAGTGTGCATCTTGCTTTT  |
|           | 30      | CTTGCCCTTAGTCTCCCATGT | AAGACAAAATCACCAGGAGC  |
|           | 31      | GGCTATATCCCAACCATGAG  | ATTTGGAGCCAGAAGTTGAG  |
| VHL       | 1       | CAGTAACGAGTTGGCCTAGC  | AAAAAGAATGCTCTGACGCT  |
|           | 2       | GAGTAGCTGGGACTACAGGC  | TCTTAAGAGCCCAAAGTGCT  |
|           | 3       | GCCACATACATGCACTCACT  | TACTTCTCTAATGGGCAGGC  |

**Table S2. Raw Sequencing Data Count, Related to Figure 2 and Table 1**

| <b>Sample Name</b> | <b>Mean Fold Coverage</b> | <b>Fraction of targets covered by at least 1 ×</b> | <b>Fraction of targets covered by at least 5 ×</b> |
|--------------------|---------------------------|----------------------------------------------------|----------------------------------------------------|
| RC-1               | 34.63                     | 95.84%                                             | 90.83%                                             |
| RC-2               | 33.82                     | 90.92%                                             | 78.81%                                             |
| RC-3               | 36.42                     | 86.81%                                             | 73.37%                                             |
| RC-4               | 24.99                     | 89.36%                                             | 74.93%                                             |
| RC-5               | 32.63                     | 92.84%                                             | 82.20%                                             |
| RC-6               | 32.56                     | 95.86%                                             | 90.54%                                             |
| RC-7               | 41.03                     | 95.37%                                             | 89.30%                                             |
| RC-8               | 27.29                     | 92.51%                                             | 80.96%                                             |
| RC-9               | 32.13                     | 82.71%                                             | 66.93%                                             |
| RC-10              | 35.2                      | 94.52%                                             | 86.72%                                             |
| RC-11              | 24.72                     | 81.77%                                             | 64.49%                                             |
| RC-12              | 27.59                     | 81.74%                                             | 65.03%                                             |
| RC-13              | 36.06                     | 91.73%                                             | 80.43%                                             |
| RC-14              | 30.4                      | 81.65%                                             | 67.29%                                             |
| RC-15              | 34.42                     | 93.95%                                             | 75.86%                                             |
| RC-16              | 41.32                     | 92.52%                                             | 84.70%                                             |
| RC-17              | 38.1                      | 92.85%                                             | 75.38%                                             |
| RC-18              | 23.91                     | 89.36%                                             | 74.88%                                             |
| RC-19              | 51.74                     | 87.74%                                             | 76.51%                                             |
| RC-20              | 30.76                     | 92.87%                                             | 73.22%                                             |
| RN-1               | 25.85                     | 94.74%                                             | 87.37%                                             |
| RN-2               | 27.45                     | 95.52%                                             | 89.25%                                             |
| RN-3               | 37.41                     | 90.84%                                             | 84.74%                                             |
| RN-4               | 32.65                     | 89.95%                                             | 75.87%                                             |
| RN-5               | 31.56                     | 96.05%                                             | 90.96%                                             |

| <b>Sample Name</b>           | <b>Mean Fold Coverage</b> | <b>Fraction of targets covered by at least 1 ×</b> | <b>Fraction of targets covered by at least 20 ×</b> |
|------------------------------|---------------------------|----------------------------------------------------|-----------------------------------------------------|
| ccRCC mix carcinoma (RC-T)   | 117.77                    | 96.32%                                             | 95.01%                                              |
| normal tissue mix DNA (RN-T) | 32.97                     | 95.73%                                             | 65.70%                                              |
